# Supplementary material for: Key differences between 13 KRAS mutation detection technologies and their relevance for clinical practice
Source: PubMed Central journal article supplement — ESMO Open. 2017 Sep 28;2(4):e000235. doi: 10.1136/esmoopen-2017-000235 (PMC5623342; doi:10.1136/esmoopen-2017-000235), 2017-09-28
Supplement: esmoopen-2017-000235supp001.pdf [file esmoopen-2017-000235supp001.pdf]

## Key differences between 13 KRAS mutation detection technologies and their relevance for clinical practice

Sherwood et al

### SUPPORTING INFORMATION

**Table S1: Description of technologies and platforms assessed in the study, where the data were generated, and regulatory status.**

| Technology                            | Regulatory status          | Platform                       | Chemistry                             | Manufacturer            | Data generated by:                     |
|---------------------------------------|----------------------------|--------------------------------|---------------------------------------|-------------------------|----------------------------------------|
| <i>therascreen</i> ® KRAS RGQ PCR Kit | FDA-approved IVD<br>CE-IVD | Qiagen Rotorgene Q             | <i>therascreen</i> ® KRAS RGQ PCR Kit | Qiagen                  | AstraZeneca, Cambridge, UK             |
| cobas® KRAS Mutation Test             | FDA-approved IVD<br>CE-IVD | Roche cobas z480               | cobas® KRAS Mutation Test             | Roche Molecular Systems | AstraZeneca, Cambridge, UK             |
| Idylla™ KRAS Mutation Test            | CE-IVD                     | Biocartis Idylla™ platform     | Idylla™ KRAS Mutation Test            | Biocartis               | Biocartis, Mechelen, Belgium           |
| iPLEX® Pro Tests                      | Research use only          | Agena Bioscience MassARRAY® 4  | iPLEX® Pro                            | Agena Bioscience        | NewGene Ltd, Newcastle – Upon-Tyne, UK |
| UltraSEEK™                            | Research use only          | Agena Bioscience MassARRAY® 4, | ULTRASEEK                             | Agena Bioscience        | Agena Bioscience, Inc, CA, USA         |

|                                                   |                   |                               |                                      |                                    |                                                                                 |
|---------------------------------------------------|-------------------|-------------------------------|--------------------------------------|------------------------------------|---------------------------------------------------------------------------------|
| ThunderBolts™ Cancer Panel                        | Research use only | Illumina MiSeq.               | RainDrop Source, MiSeq V3            | RainDance Technologies<br>Illumina | Bioprocessing Solutions Alliance, IN, USA                                       |
| Oncomine™ Focus Assay                             | Research use only | Ion Torrent PGM               | Ampliseq,                            | ThermoFisher                       | Life Technologies Clinical Services Lab, West Sacramento, CA, USA               |
| Sentosa® SQ NSCLC Panel                           | CE-IVD            | Ion Torrent PGM, ThermoFisher | Sentosa® SQ                          | Vela Diagnostics                   | Vela Diagnostics, Singapore                                                     |
| Illumina Nextera® Rapid Capture Custom Lung Panel | Research use only | Illumina                      | Nextera® V3                          | Illumina                           | Birmingham Women's Hospital NHS, West Midlands Regional Genetics Laboratory, UK |
| Ion AmpliSeq™ Cancer Hotspot Panel v2             | Research use only | Ion Torrent PGM               | Ion Ampliseq Cancer Hotspot Panel v2 | ThermoFisher                       | Addenbrookes, East Anglia NHS Clinical Genetics Laboratory, Cambridge, UK       |
| TruSight® Tumor 15                                | Research use only | Illumina OGP panel            | V3 chemistry                         | Illumina                           | Illumina, CA, USA                                                               |
| PrimePCR ddPCR Mutation Assays KRAS               | Research use only | BioRAD Bio-Rad QX200          | Prime PCR KRAS mutation assays       | BioRad                             | IMG M Laboratories, Germany                                                     |
| Sanger capillary sequencing                       | Research use only | 3730 capillary sequencer      | Big Dye 1.1                          | Applied Biosystems                 | IMG M Laboratories, Germany                                                     |

1 **SUPPLEMENTARY METHODS**

2 *therascreen*<sup>®</sup> and *cobas*<sup>®</sup> KRAS mutation testing was performed at AstraZeneca  
3 laboratories, while all other *KRAS* mutation testing methods and assays were performed at  
4 10 external partner laboratories where *KRAS* testing is conducted routinely to assist clinical  
5 practice, or conducted for research purposes. Participating laboratories were instructed to  
6 proceed with the testing process regardless of input requirements as the purpose of this  
7 experiment was to assess low copy number samples.

8 **qPCR: *therascreen*<sup>®</sup> KRAS RQG PCR (Qiagen, Hilden, Germany)**

9 *therascreen*<sup>®</sup> is based on an Amplification Refractory Mutation System and Scorpions-  
10 based allele specific PCR assay. The test consists of 8 assays; 7 *KRAS* mutations and 1  
11 control assay. It tests for p.G12A/C/D/V/R/S and p.G13D. *therascreen*<sup>®</sup> KRAS RGQ PCR kit  
12 was used in accordance with the manufacturer's protocol,[1] except for the omission of the  
13 sample qualification step due to the need to ensure that the same input of mutant copies  
14 was applied to every assay. qPCR was performed on the Rotor-Gene Q instrument and  
15 analyzed using the parameters outlined in the kit insert (software version 2.3.1). A 10 µL  
16 aliquot of the admixture DNA was diluted 1 in 5 and 5 µL of the subsequent dilution was  
17 loaded into each of the 8 mutation assays for every sample. Data analysis used the cut-off  
18 criteria defined in the manufacturer's instructions for use. The *therascreen*<sup>®</sup> assays were  
19 performed at AstraZeneca Personalised Healthcare and Biomarkers laboratories  
20 (Cambridge, UK).

21 **qPCR: *cobas*<sup>®</sup> KRAS Mutation Test (Roche Diagnostics, Mannheim, Germany)**

22 The *cobas*<sup>®</sup> KRAS mutation test uses a highly optimized allele-specific asymmetric PCR  
23 method which preferentially amplifies the target, using a TaqMelt<sup>®</sup> fluorescently-labelled  
24 hybridization probe.[2] The TaqMelt<sup>®</sup> probe binds to the target sequence and a melt curve  
25 analysis is performed. The probe increases the resolution of wild type sequence from any  
26 mutant sequence by approximately 10°C on the melt curve allowing automated interpretation  
27 and reporting of *KRAS* mutation status. A 10 µL aliquot of the admixture DNA was diluted 1

28 in 25 and 25 µL of the subsequent dilution was loaded into each of the two mutation assays  
29 for every sample. *KRAS* mutation status was characterized from the admixture DNA using  
30 the cobas® *KRAS* Mutation Test according to the manufacturers' protocol and qPCR was  
31 performed using the cobas® z480 instrument. The cobas® *KRAS* mutation test assays were  
32 performed at AstraZeneca Personalised Healthcare and Biomarkers laboratories  
33 (Cambridge, UK).

#### 34 **qPCR: Idylla™ (Biocartis NV, Belgium)**

35 The Idylla™ *KRAS* Mutation Test is a CE-IVD test intended to detect 21 *KRAS* exon 2/3/4  
36 mutations directly from colorectal cancer FFPE tissue (Idylla™ *KRAS* Mutation Test.  
37 Instructions for use). The test is performed in a single-use disposable cartridge containing all  
38 reagents necessary for FFPE sample processing and qPCR-based target amplification and  
39 detection. The Idylla™ *KRAS* Mutation Test was performed according to the manufacturers'  
40 instructions for use with the modification that a sample of the admixture DNA was mixed with  
41 PCR buffer and the Idylla™ instrument was programmed to directly pump this mixture to the  
42 Idylla™ *KRAS* cartridge PCR chambers, such that 1 µl of the sample was analyzed per  
43 PCR. After PCR, raw data were processed offline to determine mutation status (Spotfire,  
44 TIBCO Software B.V., The Netherlands). The experiment was carried out by Biocartis  
45 (Mechelen, Belgium). After PCR, raw data were processed offline using Idylla™ curve  
46 processing algorithms and *KRAS* mutation status was automatically determined (Spotfire,  
47 TIBCO Software B.V., The Netherlands).

#### 48 **MALDI-TOF: iPLEX® Pro Tests (Agena Bioscience, San Diego, CA, USA)**

49 The iPLEX® Pro test is a multiplex PCR followed by single base extension combined with  
50 MALDI-TOF Mass Spectrometry.[3] Standard iPLEX® Pro chemistry was used and MALDI-  
51 TOF detection was performed on the Agena Bioscience MassARRAY® 4 platform using the  
52 standard kit protocol.[4] The experiment was carried out by Newgene, Newcastle, UK. The  
53 iPLEX® Pro is a high-throughput mutation detection technology and allows multiple  
54 mutations to be analyzed in a single investigation using multiplex PCR reactions.[5] The

55 technology uses small (~80 base pairs) PCR product amplification followed by a single base  
56 pair extension step at the site of the mutated base of interest with a mass modified ddNTP  
57 termination mix. The change in mass is then identified. A 10 µL aliquot of the admixture DNA  
58 was diluted 1 in 2 and 2 µL of the subsequent dilution was loaded into each of the multiplex  
59 mutation assays for every sample. Primer extension was carried out for 25 activating  
60 nucleotide substitution mutations in codons 12, 13, 61 and 146 of the *KRAS* gene and 1  
61 activating mutation in *BRAF*. Standard iPlex® Pro chemistry was used and MALDI-TOF  
62 detection was performed on the Agena Bioscience MassARRAY® 4 platform using the  
63 standard kit protocol.[6] The assays were performed by Newgene Ltd, Newcastle-Upon-  
64 Tyne, UK.

#### 65 **MALDI-TOF: UltraSEEK™ (Agena Bioscience, San Diego, CA, USA)**

66 The UltraSEEK™ application is a novel minor variant detection technique able to interrogate  
67 multiple informative variants down to 0.1% within a single reaction . UltraSEEK™ is  
68 considered different from similar biochemistries by collectively amplifying all variants in a  
69 multiplex PCR, followed by a pseudo-enrichment of the minority allele via post-PCR specific  
70 targeting of these minor variants with a single base extension step where the wild type allele  
71 is omitted. The enrichment is enabled by extending the added analytic primers using  
72 biotinylated dideoxy nucleotides specific for the mutant allele. Extended products are  
73 subsequently captured to a solid support and washed to eliminate all other components,  
74 specifically excess probe. Finally, the eluted products are subsequently dispensed onto  
75 bioarrays for detection using MALDI-TOF mass spectrometry. Data analysis was performed  
76 using Typer software version 4.0.26.74 (Agena Bioscience). The software acquired raw peak  
77 intensity data for all assay products. A linear least squares function was used to fit intensities  
78 of the capture control assays and determine the per-well data quality and the normalization  
79 factor. Normalized intensity of each assay was determined using the capture control  
80 normalization factors. Normalized intensities were used to determine mutation frequencies  
81 and their statistical significance.[7] Statistical significance was determined using robust Z-

82 score (median absolute deviation [MAD]-based Z-score). A robust Z-score was calculated for  
83 each assay using the median and the MAD values determined from the outlier-trimmed  
84 dataset. Samples that exceeded the user-defined assay Z-score cut-off (default of 10) and  
85 met the peak quality criteria (adjustable minimum peak intensity and call probability of 0.8 or  
86 better) were labeled as containing the mutation by the analysis software and reported  
87 accordingly. Manual calls were made by Agena when the Z-score was over the threshold of  
88 10, but with peak quality that did not meet the threshold and when samples had a Z-score  
89 near the threshold of 10. The assays were performed by Agena Bioscience, San Diego, CA,  
90 USA.

91 **NGS: Thunderbolts™ Cancer Panel (RainDance Technologies, Billerica, MA, USA)**

92 The ThunderBolts™ Cancer Panel (RainDance Technologies) is a comprehensive NGS  
93 panel for profiling important cancer mutations, which uses 230 single molecule PCR  
94 amplicons to target 50 known cancer genes including tumor suppressors, mutation hotspots  
95 and drug resistance markers. A 10 µL aliquot of the admixture DNA was diluted 1 in 10 and  
96 10 µL of the subsequent dilution was used for library generation using RainDance  
97 Technologies' single molecule droplet based PCR technology. Droplets were generated  
98 using a RainDance RainDrop Source instrument and library synthesis was carried out using  
99 ThunderBolts™ Cancer Panel. Resulting final library quality and quantity analysis was  
100 performed using the Agilent BioAnalyzer. Paired end sequencing at 2 x 300 bp was carried  
101 out on the Illumina MiSeq instrument using the MiSeq V3 kit. Resulting data were aligned  
102 and mapped to the Human genome build 19. The alignment was performed along the length  
103 of the amplicon target using a banded Smith-Waterman alignment algorithm and variant calls  
104 were generated using the Somatic Variant Caller (v3.2.3). The sequencing was performed at  
105 Bioprocessing Solutions Alliance, IN, USA.

106 **NGS: Oncomine™ Focus Assay (ThermoFisher Scientific, Waltham, MA, USA)**

107 Sequencing libraries were generated from each DNA sample using the Oncomine™ Focus  
108 Assay, which uses AmpliSeq chemistry to amplify targeted regions from 52 cancer related

109 genes. Duplicate libraries were prepared for each sample and tagged with unique barcodes.  
110 After library generation, the Ion Select™ workflow was performed where 6 samples  
111 (DNA/RNA pairs) were multiplex templated and sequenced using the Ion Select™ 318 chip  
112 on an Ion Torrent PGM instrument. Primary analysis of data was done using IonReporter  
113 software. In order to determine and confirm the low allele frequency variants, further manual  
114 review was conducted using Integrative Genomics Viewer (IGV) (Broad Institute Cambridge,  
115 MA, USA) and compiled with custom script software. Since each sample was sequenced  
116 twice, the summary includes an average allele frequency of the duplicate libraries. These  
117 experiments were performed at Life Technologies Clinical Services Lab, West Sacramento,  
118 CA.

119 **NGS: Sentosa® SQ NSCLC Panel (Vela Diagnostics, Singapore)**

120 The Sentosa® SQ NSCLC Panel is a ready-to-use kit for automated PCR-based NGS library  
121 preparation for the detection of 113 mutations in 11 target genes (*BRAF*, *CTNNB1*, *EGFR*,  
122 *FGFR3*, *KIT*, *KRAS*, *NRAS*, *PIK3CA*, *PTEN*, *RET* and *TP53*). The minimum coverage for  
123 individual mutations must fulfil 1,000X in order to detect 5% variant frequency. The assay  
124 may not identify variants that are present in less than 5% in the extracted DNA. The  
125 sequencing was performed using Sentosa® SQ 301 (Ion Torrent PGM platform) and the  
126 Sentosa® SQ Suite software performed primary analysis (signal processing and base-  
127 calling) on raw sequencing data. After primary analysis, the data was transferred to  
128 Sentosa® SQ Reporter Server for secondary analysis (alignment and variant calling) and  
129 report generation. The assay was carried out at Vela Diagnostics (Singapore).

130 **NGS: Illumina Nextera® Rapid Capture Custom Lung Panel**

131 The Illumina Nextera® Rapid Capture Custom Lung Panel (Cancer Research United  
132 Kingdom, London, UK; Illumina, San Diego, California, USA) is a 28 gene NGS panel  
133 including *KRAS*, which uses a hybridization-based Illumina Nextera® Rapid Capture  
134 Enrichment Protocol, which is then sequenced on an Illumina MiSeq instrument using V3  
135 chemistry. The standard protocol recommends a minimum input of 50 ng of DNA in a volume

136 of 10  $\mu$ L. From the 56 mixtures provided, 49 samples did not meet this concentration  
137 requirement, however, they were processed neat without a pre-concentration step which is  
138 required to ensure consistency throughout the study. Hence, the hybridisation capture assay  
139 gave a suboptimal performance and consequently results have not been included in the  
140 analysis. The assay was carried out at Birmingham Women's Hospital, West Midlands  
141 Region Genetics Service, NHS.

142 **NGS: Ion AmpliSeq™ Cancer Hotspot v2 (ThermoFisher Scientific, Waltham, MA,**  
143 **USA)**

144 Initially, 10  $\mu$ L of cell-line derived DNA was used for the generation of Ion AmpliSeq™  
145 Cancer Hotspot Panel v2 libraries. Following PCR amplification, all samples were processed  
146 through, partial primer digestion, adapter ligation using the Ion Xpress Barcode Adapter Kit,  
147 final PCR enrichment and quantification using the Quant-IT dsDNA HS Assay (Life  
148 Technologies, UK) on Qubit 2.0. Appropriate dilutions were performed, with 20 pM of each  
149 individual indexed amplicon library pooled prior to emulsion PCR. Subsequently, 8 samples  
150 each were then sequenced on the Ion Torrent PGM platform using the 318 v2 chip (Life  
151 Technologies, UK). Sequence reads were mapped against the human reference genome  
152 (hg19) with the Torrent Mapping Alignment Program (TMAP), with variants called using the  
153 Ion Torrent Variant caller. The experiment was carried out by Addenbrookes, East Anglia  
154 NHS Clinical Genetics Laboratory, Cambridge, UK

155 **NGS: TruSight® Tumor 15**

156 TruSight® Tumor 15 uses an amplicon-based NGS library preparation (multiplexed PCR) for  
157 detection of 807 somatic mutations that are common in solid tumors in 15 genes.[8] Libraries  
158 were sequenced on a MiSeq instrument using V3 chemistry (Illumina, USA). Data were  
159 analyzed automatically on-instrument using MiSeq Reporter® v2.6 and the TruSight Tumor  
160 15 software module to generate a filtered variant report. VariantStudio data analysis  
161 software was used for additional analysis. The experiment was carried out by Illumina, CA,  
162 USA.

163 **Droplet digital PCR: PrimePCR ddPCR Mutation Assays KRAS (Bio-Rad Laboratories,**  
164 **CA, USA)**

165 With BioRAD PrimePCR ddPCR Mutation Assays *KRAS*, DNA molecules are quantified  
166 absolutely by dividing each sample into 10,000 – 20,000 droplets. Due to appropriate  
167 dilution, each droplet contains ideally  $\geq 1$  (positive) or 0 (negative) target sequence copies. A  
168 TaqMan PCR reaction is performed in each of the droplets using a *KRAS* wild type and a  
169 mutant assay. Droplets are counted as wild type or mutant positive (containing target DNA)  
170 or negative (no DNA) according to their fluorescence signal. Using the number of total  
171 droplets, the concentration of positive copies per droplet is calculated as well as the initial  
172 absolute DNA amount per sample. Droplet digital PCR (ddPCR) was performed on the  
173 QX200™ Droplet Digital PCR system (Bio-Rad Laboratories, Inc.) using human *KRAS*  
174 PrimePCR™ ddPCR™ Mutation Detection Assays in a multiplex reaction with corresponding  
175 wild type assays with 9  $\mu$ l DNA in a final reaction volume of 20  $\mu$ l and these PCR conditions:  
176 95°C, 10'; (94°C, 30"; 55°C, 1') x 40 cycles, ramp rate: 2°C/second; 98°C, 10'. Data were  
177 analyzed with QuantaSoft 1.7.4 software (Bio-Rad Laboratories, Inc.). Target concentration  
178 in each sample was expressed as copies/20  $\mu$ l well. From these data the mutant/wild type  
179 ratio was calculated for each sample. The experiment was carried out by IMG M Laboratories  
180 GmbH, Martinsried, Germany according to the manufacturer's instructions.

181 **Sanger capillary sequencing (Applied Biosystems, CA, USA)**

182 Sanger capillary sequencing is based on the incorporation of 2', 3' dideoxyribo-nucleotide-  
183 triphosphate (ddNTP) in DNA. A purified PCR product containing the region of interest is  
184 introduced into a cycled sequencing reaction, where fluorescently labelled ddNTPs are  
185 incorporated which interrupt the reaction. The sequencing products are separated in a highly  
186 denaturing polymer matrix according to their size. Fluorescence signals are collected  
187 following excitation of a nucleotide-specific reporter dye covalently linked to the terminal  
188 dideoxy-analog of the sequence product. The fluorescence of the dyes is analyzed to  
189 elucidate the DNA sequence. Sanger capillary sequencing was performed on the Applied  
190 Biosystems® 3730 DNA Analyzer using BigDye Version 1.1, human *KRAS* exons 2 and 3

191 primers (*KRASE2-V2*-for:  
192 5'ACACTGACGACATGGTTCTACAGGTGGAGTATTTGATAGTGTA3'; *KRASE2-V2*-rev:  
193 5'TACGGTAGCAGAGACTTGGTCTGGTCCTGCACCAGTAATATGC3'; *KRASE2-V3*-for: 5'  
194 ACACTGACGACATGGTTCTACACTGTGTTTCTCCCTTCTCAG3'; *KRASE2-V3*-rev: 5'  
195 TACGGTAGCAGAGACTTGGTCTAAACTATAATTACTCCTTAATGT3') and these PCR  
196 conditions: 98°C, 2'; (98°C, 15"; 57°C, 45"; 72°C, 30") x 30 cycles; 72°C, 3'. Amplicon sizes  
197 were 242 and 251 bp. Data were analyzed with SeqPilot V4.1.2 software (JSI medical  
198 systems GmbH). The experiment was carried out by IMG M Laboratories GmbH, Martinsried,  
199 Germany.

200 **Mutation detection technology questionnaire**

201

202

# MUTATION DETECTION TECHNOLOGY STUDY VENDOR QUESTIONNAIRE

203

204

## Summary

This questionnaire will form the source of data for a tabulated snapshot of the various characteristics of the mutation detection technologies employed on the 56 cell line admixtures screened by your centre. The questionnaire is tick box and drop down box enabled so should take only 5-10 minutes to complete. Thank you in advance of your providing this data as this will be an important table in the proposed manuscript.

205

### Mutation Detection Technology Questionnaire

Please answer the questions below and add in more details as necessary in the comments box provided, thank you. The data will be compiled and shown in the Platform Characteristics table in the proposed manuscript. Although the data collected in the questionnaire is reasonably detailed we intend to present relative data in the table.

#### 1. Technology Details:

|                                                                                                             |  |
|-------------------------------------------------------------------------------------------------------------|--|
| Technology Name: (Manufacturer/developer, assay, platform: e.g. Roche, cobas KRAS, Roche Light cycler z480) |  |
| Company performing the analysis: (AstraZeneca, Cambridge, UK)                                               |  |

#### 2. Handling and ease of use:

|                                                                                                                                                                                                                                                                                                                                                                                                                  |                                                                                                                                                                                                                                                                                                                                   |
|------------------------------------------------------------------------------------------------------------------------------------------------------------------------------------------------------------------------------------------------------------------------------------------------------------------------------------------------------------------------------------------------------------------|-----------------------------------------------------------------------------------------------------------------------------------------------------------------------------------------------------------------------------------------------------------------------------------------------------------------------------------|
| <p><i>How many physical handling steps are there from DNA to data generation? (How many times do you need physically move or measure)</i></p> <p>Please tick "X" in the relevant box.</p> <p>For example: Roche cobas KRAS assay: Step 1. Quantification of DNA, 2. Dilution/normalisation 3. Assay set up 4. Centrifugation 5. PCR cycling</p>                                                                  | <p>a. <input type="checkbox"/> 1-2 steps</p> <p>b. <input type="checkbox"/> 3-5 steps</p> <p>c. <input type="checkbox"/> 6-8 steps</p> <p>d. <input type="checkbox"/> 9-10 steps</p> <p>e. <input type="checkbox"/> 11-20 steps</p> <p>f. <input type="checkbox"/> &gt;20 steps</p>                                               |
| <p><i>How much "hands on" time does the above data generation process require (wet lab work)?</i></p> <p>e.g. Roche cobas KRAS assay requires 10 minutes preparing area / 1 hours defrost, 1 hour quantification and normalisation and then 30 minutes set up. Total hands on time =1 hour 40 minutes=1-2 hours.</p>                                                                                             | <p>a. <input type="checkbox"/> 0-30 mins</p> <p>b. <input type="checkbox"/> 31-60 mins</p> <p>c. <input type="checkbox"/> 1-2 hours</p> <p>d. <input type="checkbox"/> 2-5 hours</p> <p>e. <input type="checkbox"/> 5-10 hours</p> <p>f. <input type="checkbox"/> 10-20 hours</p> <p>g. <input type="checkbox"/> &gt;20 hours</p> |
| <p>Please provide any additional relevant comments you wish to provide clarification on.</p>                                                                                                                                                                                                                                                                                                                     |                                                                                                                                                                                                                                                                                                                                   |
| <p><i>How many physical handling steps are there from obtaining raw data to generation of a result that can be understood and used by a physician (data interpretation and reporting)?</i></p> <p>Please tick "X" in the relevant box.</p> <p>For example: Roche cobas KRAS assay: 1. No interpretation, just accept the data that has been generated, a PDF report suitable for physician use is generated.</p> | <p>a. <input type="checkbox"/> 1-2 steps</p> <p>b. <input type="checkbox"/> 3-5 steps</p> <p>c. <input type="checkbox"/> 6-8 steps</p> <p>d. <input type="checkbox"/> 9-10 steps</p> <p>e. <input type="checkbox"/> 11-20 steps</p> <p>f. <input type="checkbox"/> &gt;20 steps</p>                                               |
| <p>Please provide any additional relevant comments you wish to provide clarification on.</p>                                                                                                                                                                                                                                                                                                                     |                                                                                                                                                                                                                                                                                                                                   |
| <p><i>How much "hands on" time does the above data interpretation and reporting process require?</i></p> <p>e.g. Roche cobas KRAS assay requires 5 minutes collection of report, 0 time analysis as it is automated. Total hands on time =5mins= 0-30 minutes.</p>                                                                                                                                               | <p>h. <input type="checkbox"/> 0-30 mins</p> <p>i. <input type="checkbox"/> 30-60 mins</p> <p>j. <input type="checkbox"/> 1-2 hours</p> <p>k. <input type="checkbox"/> 2-5 hours</p> <p>l. <input type="checkbox"/> 5-10 hours</p> <p>m. <input type="checkbox"/> 10-20 hours</p> <p>n. <input type="checkbox"/> &gt;20 hours</p> |

|                                                                                                                                                                                                                                                                             |                                                                                                                                                                                                                                                                                                                                                                                                                                                                                                                                                                                                                                                                                                                                                                                                        |
|-----------------------------------------------------------------------------------------------------------------------------------------------------------------------------------------------------------------------------------------------------------------------------|--------------------------------------------------------------------------------------------------------------------------------------------------------------------------------------------------------------------------------------------------------------------------------------------------------------------------------------------------------------------------------------------------------------------------------------------------------------------------------------------------------------------------------------------------------------------------------------------------------------------------------------------------------------------------------------------------------------------------------------------------------------------------------------------------------|
| <p><i>How difficult is the technology to use?</i></p> <p>Please consider how the assay would be run in a clinical environment, who would be running it: a trained skilled scientist, a technician, a nurse or doctor and what level of knowledge and skill is required.</p> | <ul style="list-style-type: none"> <li>a. <input type="checkbox"/> Plug and play, no skill required e.g. insert FFPE tumour sample- result shown automatically.</li> <li>b. <input type="checkbox"/> Requires simple familiarisation (short training session i.e. 1 day) Basic molecular biology technique required. No interpretation of results required.</li> <li>c. <input type="checkbox"/> Requires detailed training on software and platform use. Medium length course 1-2 days to be proficient. Basic skills required, some minimal interpretation.</li> <li>d. <input type="checkbox"/> Requires detailed training over a period of more than 2 days. Requires highly skilled scientist or proficient technician and specialised knowledge to interpret, handle and report data.</li> </ul> |
| <p>Please provide any additional comments if the options do not cover your specific assay/ platform.</p>                                                                                                                                                                    |                                                                                                                                                                                                                                                                                                                                                                                                                                                                                                                                                                                                                                                                                                                                                                                                        |

3. Turn- around- time from sample to result

|                                                                                                                                                                                                                                                                                                                                                                                                                                                                                                                                |                                                                                                                                                                                                                                                                                                                                                                                                                                                                                                                                                                                                                                                                                                                                     |
|--------------------------------------------------------------------------------------------------------------------------------------------------------------------------------------------------------------------------------------------------------------------------------------------------------------------------------------------------------------------------------------------------------------------------------------------------------------------------------------------------------------------------------|-------------------------------------------------------------------------------------------------------------------------------------------------------------------------------------------------------------------------------------------------------------------------------------------------------------------------------------------------------------------------------------------------------------------------------------------------------------------------------------------------------------------------------------------------------------------------------------------------------------------------------------------------------------------------------------------------------------------------------------|
| <p><i>How long does it take to process and provide a result to a physician once a sample has been received?</i></p> <p>Please provide the actual time it would take to go from DNA to obtaining a simple result that can be reported and understood by a physician.</p> <p>For example: Roche cobas KRAS can be set up, PCR cycled and a report for physician is automatically generated in 2-4 hours. A large NGS panel covering multiple genes and requiring manual curation may take 2-3 weeks. (NB work week= 5 days).</p> | <ul style="list-style-type: none"> <li>a. <input type="checkbox"/> &lt;1 hour</li> <li>b. <input type="checkbox"/> 1-2 hours</li> <li>c. <input type="checkbox"/> 2-4 hours</li> <li>d. <input type="checkbox"/> 4-6 hours</li> <li>e. <input type="checkbox"/> 1 working day</li> <li>f. <input type="checkbox"/> 1-2 working days</li> <li>g. <input type="checkbox"/> 2-3 working days</li> <li>h. <input type="checkbox"/> 3-4 working days</li> <li>i. <input type="checkbox"/> 5 working days</li> <li>j. <input type="checkbox"/> 5-10 working days</li> <li>k. <input type="checkbox"/> 2-3 work weeks</li> <li>l. <input type="checkbox"/> 3-4 work weeks</li> <li>m. <input type="checkbox"/> &gt;4 work weeks</li> </ul> |
| <p>Please provide information explaining the turnaround time e.g. Platform is "Point of Care" FFPE sample is inserted and result is obtained in 40 mins, or manual curation of NGS panel results takes 14 days.</p>                                                                                                                                                                                                                                                                                                            |                                                                                                                                                                                                                                                                                                                                                                                                                                                                                                                                                                                                                                                                                                                                     |

4. Multiplexing Level

|                                                                                                                                                                                     |                                                                                                                                                                                                                                                                                                        |
|-------------------------------------------------------------------------------------------------------------------------------------------------------------------------------------|--------------------------------------------------------------------------------------------------------------------------------------------------------------------------------------------------------------------------------------------------------------------------------------------------------|
| <p><i>How many separate reactions are there for each sample?</i><br/>e.g. Roche cobas KRAS assay requires 2 separate reactions, one for codon 12 and 13 and one for codon 61.</p>   | <ul style="list-style-type: none"> <li>a. <input type="checkbox"/> 1</li> <li>b. <input type="checkbox"/> 2</li> <li>c. <input type="checkbox"/> 3-5</li> <li>d. <input type="checkbox"/> 6-7</li> <li>e. <input type="checkbox"/> 8+</li> </ul>                                                       |
| <p><i>How many samples can be analysed in parallel on one "run"?</i><br/>e.g. Roche cobas KRAS assay requires separate reactions, one for codon 12 and 13 and one for codon 61.</p> | <ul style="list-style-type: none"> <li>a. <input type="checkbox"/> 1</li> <li>b. <input type="checkbox"/> 2-10</li> <li>c. <input type="checkbox"/> 11-24</li> <li>d. <input type="checkbox"/> 25-48</li> <li>e. <input type="checkbox"/> 49-96</li> <li>f. <input type="checkbox"/> &gt;96</li> </ul> |

|                                                                                                                                                                                                                                                                 |                                                                                                                                                                                                                                                                                                                              |
|-----------------------------------------------------------------------------------------------------------------------------------------------------------------------------------------------------------------------------------------------------------------|------------------------------------------------------------------------------------------------------------------------------------------------------------------------------------------------------------------------------------------------------------------------------------------------------------------------------|
| <p><i>How many genes are targeted by the assay?</i><br/>e.g. in the case of Roche cobas KRAS assay, one.</p>                                                                                                                                                    | <p>a. <input type="checkbox"/> 1<br/>b. <input type="checkbox"/> 2<br/>c. <input type="checkbox"/> 3-5<br/>d. <input type="checkbox"/> 6-10<br/>e. <input type="checkbox"/> 11+</p>                                                                                                                                          |
| <p><i>How many codons are assayed by the test?</i><br/>e.g. in the case of Roche cobas KRAS assay, 3 (G12,13 and Q61). In the case of multiple gene panels include all codons.</p>                                                                              | <p>a. <input type="checkbox"/> 1<br/>b. <input type="checkbox"/> 2<br/>c. <input type="checkbox"/> 3-5<br/>d. <input type="checkbox"/> 6-10<br/>e. <input type="checkbox"/> 11+<br/>f. <input type="checkbox"/> Direct sequencing, complete coverage<br/>g. <input type="checkbox"/> Direct sequencing, hotspot coverage</p> |
| <p><i>How many individual mutations are detectable by the assay (within the assayed region)?</i><br/>e.g. Roche cobas KRAS taqmelt covers all possible mutations in codon 12,13 and 61. Qiagen <i>therascreen</i> covers 7, sequencing covers all possible.</p> | <p>a. <input type="checkbox"/> 1<br/>b. <input type="checkbox"/> 2<br/>c. <input type="checkbox"/> 3-5<br/>d. <input type="checkbox"/> 6-10<br/>e. <input type="checkbox"/> 11+<br/>f. <input type="checkbox"/> All possible</p>                                                                                             |

5. DNA input requirements

|                                                                                                                                                                                                                                                                                                                    |                                                                                                                                                                  |
|--------------------------------------------------------------------------------------------------------------------------------------------------------------------------------------------------------------------------------------------------------------------------------------------------------------------|------------------------------------------------------------------------------------------------------------------------------------------------------------------|
| <p><i>What is the recommended minimum quantity of DNA?</i><br/>(please use drop down selector)</p>                                                                                                                                                                                                                 |                                                                                                                                                                  |
| <p><i>How much tissue sectioned off a block is typically needed for the assay?</i><br/>e.g. Roche cobas KRAS requires 5 µm or 1 section (1 x 5 µm section in the vast majority of cases, 10 µm in the event of insufficient DNA being obtained).</p>                                                               | <p>a. <input type="checkbox"/> 5 µm<br/>b. <input type="checkbox"/> 10 µm<br/>c. <input type="checkbox"/> 15-20 µm<br/>d. <input type="checkbox"/> &gt;20 µm</p> |
| <p><i>Are there any other pre-analytical requirements that needs to be considered?</i><br/>e.g. Roche cobas KRAS requires that tumour tissue is &lt;1 year old in the case of blocks and &lt;60 days if on slides. Is also requires that the tissue is fixed in 10% Neutral Buffered Formalin and not stained.</p> |                                                                                                                                                                  |
| <p>Please include any other information you feel needs to be considered in the manuscript.</p>                                                                                                                                                                                                                     |                                                                                                                                                                  |

6. Limit of Detection

|                                                                                                                                                                                                            |          |
|------------------------------------------------------------------------------------------------------------------------------------------------------------------------------------------------------------|----------|
| <p><i>What is the claimed or validated percentage limit of detection (sensitivity) of the test?</i><br/>E.g. in the case of Roche cobas KRAS assay, 5% is claimed.<br/>(please use drop down selector)</p> | <p>5</p> |
|------------------------------------------------------------------------------------------------------------------------------------------------------------------------------------------------------------|----------|

7. Regulatory status

|                                                                                                                                                                           |                                                                                                                                                                                                                                                                                                                                                                                                                                                                                                                                                                                                                                                                                          |
|---------------------------------------------------------------------------------------------------------------------------------------------------------------------------|------------------------------------------------------------------------------------------------------------------------------------------------------------------------------------------------------------------------------------------------------------------------------------------------------------------------------------------------------------------------------------------------------------------------------------------------------------------------------------------------------------------------------------------------------------------------------------------------------------------------------------------------------------------------------------------|
| <p><i>What is the regulatory status of the platform?</i><br/>Please check all that apply</p>                                                                              | <p>a. <input type="checkbox"/> 21CFR Establishment Registration<br/>b. <input type="checkbox"/> 21CFR Medical Device Listing<br/>c. <input type="checkbox"/> 510(k) Premarket Notification<br/>d. <input type="checkbox"/> PMA- Premarket Approval<br/>e. <input type="checkbox"/> Good Manufacturing Practice- 21CFR part 820<br/>f. <input type="checkbox"/> Research Use Only</p>                                                                                                                                                                                                                                                                                                     |
| <p><i>What is the regulatory status of the assay?</i><br/>Please check all that apply</p>                                                                                 | <p>a. <input type="checkbox"/> 21CFR Establishment Registration<br/>b. <input type="checkbox"/> 21CFR Medical Device Listing<br/>c. <input type="checkbox"/> 510(k) Premarket Notification<br/>d. <input type="checkbox"/> PMA- Premarket Approval<br/>e. <input type="checkbox"/> Good Manufacturing Practice- 21CFR part 820<br/>f. <input type="checkbox"/> Laboratory developed test<br/>g. <input type="checkbox"/> Investigational Use Only commercial kit<br/>h. <input type="checkbox"/> Research Use Only commercial kit<br/>i. <input type="checkbox"/> Test performed in CLIA or equivalent accredited clinical testing laboratory<br/>j. <input type="checkbox"/> CE/IVD</p> |
| <p>Please provide any other information that may be helpful or any other quality of the technology that makes it stand apart from other technologies. E.g. footprint.</p> |                                                                                                                                                                                                                                                                                                                                                                                                                                                                                                                                                                                                                                                                                          |

Once the questionnaire is completed, please save and forward to

Thank you very much for your time.

206 **REFERENCES**

1. Lee S, Cao J, May T, et al. Performance Characteristics of a PCR Assay for the Detection of KRAS Mutations in Formalin-Fixed Paraffin-Embedded Tissue Samples of Non-Small Cell Lung Cancer. *J Mol Biomark Diagn* 2015;6:5.
2. Fumagalli D, Gavin PG, Taniyama Y, et al. A rapid, sensitive, reproducible and cost-effective method for mutation profiling of colon cancer and metastatic lymph nodes. *BMC Cancer* 2010;10:101.
3. Sherwood JL, Muller S, Orr MC, et al. Panel based MALDI-TOF tumour profiling is a sensitive method for detecting mutations in clinical non small cell lung cancer tumour. *PLoS One*. 2014;9(6):e100566.
4. Fumagalli D, Gavin PG, Taniyama Y, Kim SI, Choi HJ, Paik S, et al. A rapid, sensitive, reproducible and cost-effective method for mutation profiling of colon cancer and metastatic lymph nodes. *BMC Cancer*. 2010;10:101.
5. Mosko MJ, Nakorchevsky AA, Flores E, et al. Ultrasensitive Detection of Multiplexed Somatic Mutations Using MALDI-TOF Mass Spectrometry. *J Mol Diagn* 2016;18:23–31.
6. Chan M, Smirnov A, Mulawadi F, et al. A Novel System Control for Quality Control of Diagnostic Tests Based on Next-Generation Sequencing. *The Journal of Applied Laboratory Medicine: An AACCC Publication* 2016;1.1:25–35.
7. Pinto P, Rocha P, Veiga I, et al. Comparison of methodologies for KRAS mutation detection in metastatic colorectal cancer. *Cancer Genet* 2011;204:439–46.
8. Illumina. TruSight Tumor 15 Kit Support [28 October 2016].
